1 **Bioelectrical Impedance Analysis in the nutritional assessment**  
2 **and prediction of complications in patients undergoing surgery**  
3 **for head and neck malignancies, A pilot observational study**  
4

5 Lai Yi Ting<sup>1¶</sup>, Peh Hui Yee<sup>2¶</sup>, Hanis Binte Abdul Kadir<sup>3&</sup>, Lee Chun Fan<sup>4&</sup>, N.  
6 Gopalakrishna Iyer<sup>5-7¶</sup>, Wong Ting Hway<sup>8¶</sup>, Gerald Tay Ci An<sup>5¶\*</sup>

7 <sup>1</sup>Yong Loo Lin School of Medicine, Singapore

8 <sup>2</sup>Dietetics, Singapore General Hospital, Singapore

9 <sup>3</sup>Health Services Research unit, Singapore General Hospital, Singapore

10 <sup>4</sup>Centre for Quantitative Medicine, Duke-NUS Medical School, Singapore

11 <sup>5</sup>Department of Head and Neck Surgery, Singapore General Hospital, Singapore

12 <sup>6</sup>Department of Head and Neck Surgery, National Cancer Centre, Singapore

13 <sup>7</sup>Duke-NUS Medical School, Singapore

14 <sup>8</sup>Health Services and Systems Research, Duke-NUS Medical School, Singapore

15  
16 **\*Corresponding Author:**

17 Dr Gerald Tay Ci An

18 Senior Consultant

19 Department of Head and Neck Surgery, Singapore General Hospital

20 Tel: (65) 6222 3322

21 Fax: (65) 6321 4377

22 Email: [gerald.tay.c.a@singhealth.com.sg](mailto:gerald.tay.c.a@singhealth.com.sg) (GC)

23  
24 <sup>¶</sup>These authors contributed equally to this work.

25 <sup>&</sup>These authors also contributed equally to this work.

26

## 27 **Abstract**

## 28 **Background**

29 Patients with head and neck malignancies are especially vulnerable to developing  
30 malnutrition, which has a significant impact on morbidity and mortality. Identification of high  
31 risk patients is hence critical for optimising outcomes.

## 32 **Objective**

33 It is hypothesised that bioimpedance analysis (BIA) can provide information on  
34 nutritional status and risk of perioperative complications in a timely and accurate manner. The  
35 study objectives are; to correlate BIA parameters with Subjective Global Assessment (SGA)  
36 scores, and determine the association of BIA parameters with common perioperative  
37 complications in patients undergoing head and neck surgery.

## 38 **Method**

39 This is a cohort study of 61 patients who were admitted for elective head and neck  
40 surgery from 2018-2019. Prior to surgery, patients were evaluated in a preoperative  
41 multidisciplinary allied health professional clinic for formal SGA scoring. Bioelectrical  
42 impedance analysis was performed using the Bodystat Quadscan 4000. One-way ANOVA and  
43 Fisher's exact test were performed for associations between SGA and BIA parameters and  
44 receiver operating characteristic (ROC) curves were plotted for determination of optimal cut-  
45 off values of phase angle and Wellness marker in detecting malnutrition and perioperative  
46 pneumonia using Youden's Index (YI).

## 47 **Results**

48 45 males and 16 females with mean  $\pm$  SD age of  $62 \pm 1.6$  years old were included in  
49 the study. Significant differences were observed in Wellness Marker ( $p=0.004$ ) and phase angle

50 (p=0.006) amongst patients in the 3 SGA categories. BIA parameters (p=0.011 and p=0.032  
51 for Wellness Marker and phase angle respectively) were associated with perioperative  
52 pneumonia. No significant differences were observed for other perioperative complications  
53 namely surgical site infections, salivary leak/fistula, and flap complications.

## 54 **Conclusion**

55 Bioelectrical Impedance Analysis is associated with Subjective Global Assessment and  
56 shows promise as a preoperative tool, in conjunction with SGA, to detect malnutrition in patients  
57 undergoing surgery for head and neck malignancies and highlight patients at risk of developing  
58 perioperative pneumonia.

## 59 **Introduction**

60           Despite major advancements in healthcare, malnutrition remains ubiquitous in patients  
61 worldwide. Various studies have estimated worrying prevalence rates ranging from 20-50%.(1-  
62 3) In Singapore, up to one-third of admitted patients suffer from malnutrition.(4) The impact  
63 of malnutrition cannot be underplayed. Prolonged stays, increased readmission rates, treatment  
64 intolerance and higher in-patient and long-term mortality rates are known consequences in such  
65 patients globally.(5-7) Malnourished surgical patients have additional intraoperative and post-  
66 operative risks including: infections, delayed wound healing, impaired cardiorespiratory  
67 functions, and an increased risk of developing severe perioperative complications.(8) The  
68 culmination of these issues generate significant healthcare costs and reduce quality of life.(3)

69           Patients undergoing surgery for head and neck malignancies are notably vulnerable to  
70 developing malnutrition and up to 80% of patients with head and neck cancer are  
71 malnourished.(8) Common symptoms such as loss of appetite, xerostomia, taste alterations and  
72 dysphagia impair deglutition and mastication processes, leading to poor feeding and  
73 malnutrition.(9) Furthermore, inflammation and increased catabolism secondary to malignancy  
74 can also severely deplete muscle mass.(10)

75           Timely and accurate identification of patients at high risk for malnutrition is critical as  
76 it allows for early intervention for enhanced outcomes.(3) Therefore, there is a compelling need  
77 for robust, reliable and quick screening instruments to detect malnutrition. The Subjective  
78 Global Assessment (SGA), which relies on the nutritional history and clinical examination for  
79 a subjective impression of nutrition status has been a widely endorsed method of nutritional  
80 screening(11-13) and is considered by many to be the gold-standard. However, this method is  
81 subjective, time consuming and requires expertise.(14)

82 In recent years, bioimpedance analysis (BIA) has been lauded as a portable, safe,  
83 reproducible, inexpensive and non-invasive way of assessing body composition and nutritional  
84 status.(15) Specifically, BIA utilizes predictive equations via measurements of resistance (R)  
85 and reactance (Xc) of body tissues along with anthropometric data to generate the phase  
86 angle(16), a useful parameter reflective of body cell mass and cell membrane functions.(17)  
87 The Wellness marker, on the other hand, is a newly introduced parameter that calculates  
88 impedance ratio at various levels of frequency to reflect the generalized state of health of body  
89 cells without the need for predictive equations.

90 The favorable role of BIA in detection of malnutrition and prognosis have been  
91 demonstrated in various surgical patient populations such as in cardiac surgery(18),  
92 gastrointestinal surgery(19) and surgical cancer patients(20) internationally, however, no data  
93 exists on the use of bioimpedance for detecting malnutrition in patients undergoing surgery  
94 for head and neck malignancies in Singapore. Hence, the current study aims to determine the  
95 correlation between SGA scores and BIA parameters, as well as the correlation of BIA  
96 parameters with common perioperative complications in patients undergoing head and neck  
97 surgery.

## 98 **Materials and Methods**

99           A prospective study was carried out on 61 patients out of a total of 97 patients scheduled  
100 for major head and neck oncological surgery in a tertiary hospital in Singapore from 2018 to  
101 2019. These patients consented to the use of their personal data for research purpose and the  
102 study was approved by the institution's ethics committee CIRB No. 2018/2234. Due to patient  
103 privacy policies of the institution, the authors are unable to give characteristics of those who  
104 refused to be included in the study.

105           Prior to surgery, patients were evaluated in a preoperative multidisciplinary allied  
106 health professional clinic. Subjective Global Assessment (SGA) scores were evaluated by  
107 certified dietitians on 61 patients prior to surgery and patients were identified as either well  
108 nourished, moderately malnourished or severely malnourished. Bioelectrical impedance  
109 analysis measuring phase angles and Wellness marker values was performed using the  
110 Bodystat Quadscan 4000 in 53 patients prior to surgery.

111           All patients were closely monitored and incidences of perioperative complications such  
112 as pneumonia, surgical site infections, salivary leak and/or fistula formation and flap  
113 complications were recorded until time of discharge.

114           Statistical analysis was performed with R (version 4.0.2). One-way ANOVA and  
115 Fisher's exact test were used to test the association between the BIA parameters, SGA scores  
116 and development of perioperative complications such as pneumonia and surgical site infections.  
117 Patients who underwent flap surgeries and/or surgeries that had the potential for salivary leaks  
118 were analysed for the development of flap complications and salivary leak respectively.  
119 Receiver operating characteristic (ROC) curves were plotted to analyse the area under the  
120 curves (AUC). Optimal cut-off values of Wellness marker and phase angle for predicting  
121 malnutrition and perioperative pneumonia were obtained according to the Youden Index (YI).

## 122 **Results**

### 123 **Patient characteristics**

124 45 males and 16 females aged ranging from 25 to 88 years old were included in the  
125 study. The mean  $\pm$  SD age was  $62 \pm 1.6$  years old and the mean  $\pm$  SD BMI was  $23.3 \pm 4.0$ .

126 Most patients (90.2%) were diagnosed with squamous cell carcinoma in the head and  
127 neck region. The remaining patients were diagnosed with adenoid cystic carcinoma, carcinoma  
128 ex pleomorphic adenoma, osteosarcoma, and undifferentiated nasopharyngeal carcinoma  
129 respectively.

130

### 131 **Prevalence of malnutrition**

132 Based on the SGA scoring, 24 (39.3%) patients were found to be well-nourished, 32  
133 (52.5%) patients were moderately malnourished, and 3 (4.9%) patients were severely  
134 malnourished.

135 Patient characteristics and nutritional status determined by SGA are summarised in

136 **Table I.**

137

138

139 **Table 1. Baseline patient characteristics**

| <b>Characteristics</b>       | <b>N</b> | <b>Total</b> | <b>Mean ± SD<sup>1</sup></b> |
|------------------------------|----------|--------------|------------------------------|
| Age                          | 61       |              | 62 ± 1.6                     |
| <b>Gender</b>                | 61       |              |                              |
| Male                         |          | 45 (73.8%)   |                              |
| Female                       |          | 16 (26.2%)   |                              |
| BMI                          | 61       |              | 23.3 ± 4.0                   |
| Length of stay               | 61       |              | 21 ± 19                      |
| <b>Diagnosis</b>             | 61       |              |                              |
| Squamous cell carcinoma      |          | 55 (90.2%)   |                              |
| Adenoid cystic carcinoma     |          | 2 (3.3%)     |                              |
| Nasopharyngeal carcinoma     |          | 2 (3.3%)     |                              |
| Carcinoma ex-pleomorphic     |          | 1 (0.02%)    |                              |
| Osteosarcoma                 |          | 1 (0.02%)    |                              |
| <b>Neoplasm sites</b>        | 61       |              |                              |
| Oral cavity                  |          | 38 (62.3%)   |                              |
| Oropharynx                   |          | 7 (11.5%)    |                              |
| Nasal cavity                 |          | 3 (4.9%)     |                              |
| Nasopharynx                  |          | 1 (1.6%)     |                              |
| Larynx                       |          | 6 (9.9%)     |                              |
| Hypopharynx                  |          | 2 (3.3%)     |                              |
| Salivary gland               |          | 2 (3.3%)     |                              |
| Thyroid                      |          | 1 (1.6%)     |                              |
| Middle ear                   |          | 1 (1.6%)     |                              |
| <b>T Staging</b>             | 61       |              |                              |
| T0                           |          | 1 (1.6%)     |                              |
| T1                           |          | 15 (24.6%)   |                              |
| T2                           |          | 14 (23.0%)   |                              |
| T3                           |          | 13 (21.3%)   |                              |
| T4                           |          | 18 (29.5%)   |                              |
| <b>SGA<sup>2</sup> group</b> | 59       |              |                              |
| Well nourished               |          | 24 (40.6%)   |                              |
| Moderately malnourished      |          | 32 (53.1%)   |                              |
| Severely malnourished        |          | 3 (6.3%)     |                              |
| <b>BIA parameters</b>        | 53       |              |                              |
| Phase angle (°)              |          |              | 5.95 ± 1.7                   |
| Wellness marker (Hz)         |          |              | 0.80 ± 0.05                  |
| Fat mass (% of TBW3)         |          |              | 29.0 ± 8.4                   |
| Lean mass (% of TBW)         |          |              | 71.0 ± 8.4                   |
| Water mass (% of TBW)        |          |              | 59.5 ± 6.7                   |
| Body cell mass (kg)          |          |              | 28.7 ± 6.4                   |

140

141 **BIA parameters**

142 The mean ± SD value of phase angle recorded was 5.96° ± 1.7 while the mean ± SD

143 Wellness marker value was 0.80 ± 0.05. Other parameters recorded from BIA, including



144 individual components of fat, muscle and water masses as a percentage of total body weight  
145 are summarised in Table I.

146 The mean  $\pm$  SD duration of stay was  $21 \pm 19$  days. In the course of their hospital stay,  
147 21 (34.4%) patients developed perioperative complications. Specifically, 6 developed  
148 pneumonia, 9 patients developed surgical site infections, 2 patients developed salivary leak or  
149 had fistula formation and 7 patients had flap complications. None of the patients suffered acute  
150 myocardial infarctions or cerebrovascular accidents and there were no deaths recorded during  
151 admission.

152 Among the 3 SGA groups, there were statistically significant differences in phase angle  
153 ( $p=0.006$ ) and the Wellness marker ( $p=0.004$ ) measurements, as seen in **Table II**.

154 The optimal phase angle cut-off in predicting for moderate and severe malnutrition was  
155 below  $4.7^\circ$  (sensitivity 45.2%, specificity 95.5% YI: 0.406) while the optimal Wellness marker  
156 cut-off value in predicting for moderate and severe malnutrition was above 0.817. (sensitivity  
157 60.0%, specificity 86.4% YI: 0.464). **Fig I** shows the receiver operating characteristic (ROC)  
158 curve of phase angle and Wellness marker for detecting malnutrition respectively. Both phase  
159 angle (AUC: 0.749) and Wellness marker (AUC: 0.755) provides fair diagnostic accuracy in  
160 identifying patients who are malnourished.

161 Among all perioperative complications recorded, there were statistically significant  
162 differences in phase angle ( $p=0.032$ ) and Wellness marker ( $p=0.011$ ) values in patients who  
163 developed pneumonia. (**Table III**) No statistical differences in phase angle and Wellness  
164 marker was observed for the development of surgical site infections, salivary leak/fistula, and  
165 flap complications respectively.

166 The optimal phase angle cut off in predicting for perioperative pneumonia was below  
167  $5.5^\circ$  (sensitivity 83.3%, specificity 69.8% YI: 0.531) while the optimal Wellness marker cut  
168 off was above 0.829 (sensitivity 100%, specificity 74.4% YI:0.744). **Fig II** shows the receiver

169 operating characteristics (ROC) curve for phase angle and Wellness marker in predicting for  
 170 development of perioperative pneumonia. Both phase angle (AUC 0.767) and Wellness marker  
 171 (AUC 0.853) displayed good discriminating ability in predicting patients with perioperative  
 172 pneumonia.

173 **Fig 1. Receiver Operating Characteristic (ROC) curve of phase angle and wellness**  
 174 **marker for detecting malnutrition.** Both phase angle (AUC: 0.749) and Wellness marker  
 175 (AUC: 0.755) provides fair diagnostic accuracy in identifying patients who are malnourished.

176 **Fig 2. Receiver Operating Characteristic (ROC) curve of phase angle and wellness**  
 177 **marker for predicting the development of perioperative pneumonia.** Both phase angle  
 178 (AUC 0.767) and Wellness marker (AUC 0.853) displayed good discriminating ability in  
 179 predicting patients with perioperative pneumonia.

180 **Table II: Phase angle and Wellness marker differences across SGA groups**

| Characteristic       | Well-<br>Nourished<br>N = 26 <sup>1</sup> | Moderately<br>malnourished<br>N=32 <sup>1</sup> | Severely<br>Malnourished<br>N=3 <sup>1</sup> | p-value <sup>2</sup> |
|----------------------|-------------------------------------------|-------------------------------------------------|----------------------------------------------|----------------------|
| Phase Angle (°)      | 6.79 (1.53)                               | 5.41 (1.55)                                     | 4.97 (1.32)                                  | 0.006                |
| Wellness Marker (Hz) | 0.78 (0.05)                               | 0.82 (0.05)                                     | 0.84 (0.04)                                  | 0.004                |

181 <sup>1</sup> Mean (SD)  
 182 <sup>2</sup> One-way ANOVA

183 **Table III: Phase angle and Wellness marker differences in patients who developed**  
 184 **perioperative complications**

| Perioperative complications            | N  | Yes <sup>1</sup> | No <sup>1</sup> | p-value <sup>2</sup> |
|----------------------------------------|----|------------------|-----------------|----------------------|
| <b><i>Pneumonia</i></b>                | 53 |                  |                 |                      |
| Phase angle                            |    | 4.77 (1.25)      | 6.26 (1.61)     | 0.032                |
| Wellness marker (Hz)                   |    | 0.85 (0.02)      | 0.79 (0.05)     | 0.011                |
| <b><i>Surgical Site Infections</i></b> | 53 |                  |                 |                      |
| Phase angle                            |    | 6.29 (0.91)      | 6.06 (1.77)     | 0.70                 |
| Wellness marker (Hz)                   |    | 0.79 (0.03)      | 0.80 (0.05)     | 0.80                 |
| <b><i>Salivary Leak/Fistula</i></b>    | 34 |                  |                 |                      |
| Phase angle                            |    | 5.95 (0.64)      | 6.40 (1.57)     | 0.70                 |
| Wellness marker (Hz)                   |    | 0.80 (0.02)      | 0.79 (0.05)     | 0.70                 |
| <b><i>Flap Complications</i></b>       | 25 |                  |                 |                      |
| Phase angle                            |    | 6.10 (1.10)      | 6.26 (1.86)     | 0.90                 |
| Wellness marker (Hz)                   |    | 0.81 (0.04)      | 0.79 (0.05)     | 0.70                 |

186 <sup>1</sup> Mean (SD)  
 187 <sup>2</sup> One-way ANOVA

## 188 **Discussion**

189           In our study, we found that a sizeable proportion of patients undergoing surgery for  
190 head and neck malignancies were malnourished (57.4%). Other studies have similarly reported  
191 high incidences of malnutrition in head and neck cancer patients, with prevalence rates ranging  
192 from 25% to 80%.(8, 21, 22)

193           Patients suffering from head and neck malignancies are especially susceptible to  
194 developing malnutrition because of impaired metabolism from disease processes, poor oral  
195 intake due to symptoms such as dysphagia, anorexia, mucositis, xerostomia and taste  
196 alterations.(23, 24) Furthermore, many patients suffer from chronic malnutrition associated  
197 with alcohol and tobacco use, compounding the present issue.(8)

198           Multiple cohort studies have demonstrated association between SGA scores and BIA  
199 parameters in healthy subjects(25), hospital in-patients(15) and surgical patients.(18, 20, 26)  
200 Notably, Malecka-Massalska *et al* demonstrated significantly lower phase angles amongst  
201 malnourished patients in a cohort of 75 newly diagnosed head and neck cancer patients.(27)  
202 Our results support these findings.

203           Bioimpedance analysis can provide valuable information on nutritional status via the  
204 determination of phase angles, which is a measure of cell membrane integrity and vitality and  
205 hence reliably reflects cellular health.(28) However, reference values of phase angles vary  
206 according to sex, age, BMI and disease processes.(29) Therefore, interpretation of phase angles  
207 should be population specific, as body composition varies between populations. For instance,  
208 higher body fat percentages in Asians compared to Caucasian counterparts of the same BMI  
209 presents significant challenges in comparing between studies. In the present study, we  
210 established optimal cut-offs specific to head and neck surgical patients in an Asian context. It  
211 may also be relevant for use in patients with head and neck squamous cell carcinoma, as these

212 patients form the majority (90.2%) in our study population. Further studies will be required to  
213 validate and refine the values reported. The Wellness marker is a relatively newer parameter  
214 introduced only in more modern BIA systems and differs from phase angle measurements in  
215 that no predictive equations are required. Thus, Wellness marker values can be compared  
216 across populations as it is not affected by the subject's weight, gender, age nor BMI values. To  
217 our knowledge, there are no other studies on malnutrition with Wellness marker measurements.

218 Our study also established that BIA predicts development of perioperative pneumonia.  
219 Several other studies have also demonstrated the role of BIA in predicting complications.(19)  
220 In our study population, BIA was predictive only for perioperative pneumonia amongst other  
221 complications studied, namely salivary leak, wound infections, and flap complications. BIA  
222 does not readily predict for the latter complications as they are often multifactorial and are  
223 likely more dependent on risk factors such as type of surgery, previous irradiation and other  
224 technical factors, which varies greatly between individuals. On the contrary, malnutrition has  
225 been strongly associated with pneumonia; protein calorie malnutrition has been found to impair  
226 pulmonary cell-mediated immunity processes and clearance of pathogens, resulting in  
227 increased incidence, severity and duration of pulmonary infections in malnourished  
228 individuals.(30) Besides perioperative complications, studies focused on head and neck cancer  
229 patients have also showed correlation of BIA parameters with prolonged hospital stay(31),  
230 survival rates(9, 10, 32), and radiotherapy outcomes.(33)

231 The value of BIA has evolved greatly since it was validated for use in assessing human  
232 body composition in 1983.(34) Since then, it has been well regarded as an objective, convenient,  
233 non-invasive, safe, portable and inexpensive tool for assessment of malnutrition and more.(35,  
234 36) BIA may also be particularly useful in determining nutritional status and prognosis in  
235 cancer patients, as malignancy alter homeostatic processes and alters body composition.(37)  
236 However, BIA measures cannot be extrapolated to other populations and requires individuals

237 to be relatively well hydrated for accurate measurements. (37) Due to limited validation studies  
238 in hospitalised patients and variability between BIA devices and body compartments estimated  
239 within studies, the prevailing American Society for Parenteral and Enteral Nutrition (ASPEN)  
240 clinical guidelines have not yet recommended BIA for use in clinical populations. (38)The  
241 SGA, on the other hand, is a validated method that is commonly employed in clinical settings.  
242 While it has achieved wide acceptance in its use globally(39), SGA lacks sensitivity to detect  
243 acute changes in nutritional status. (40, 41)Furthermore, it remains a subjective tool with inter-  
244 observer variability which greatly impairs its applicability on a continuum.(12, 42) Unlike BIA,  
245 SGA is also time consuming and requires trained professionals for reliable administration.(14)  
246 Therefore, we propose the use of BIA as a useful and convenient adjunct with other measures  
247 of nutrition in identifying and predicting for malnutrition and perioperative pneumonia.

248         The limitations of our study include a small patient cohort size from a single institution  
249 and the lack of long term follow up data. In addition, the type of peri-operative pneumonia and  
250 subsequent interventions these patients received have not been discussed within the scope of  
251 this paper. Further research may be required to determine cost effectiveness and practicality of  
252 BIA for routine use in an institutional setting.

## 253 **Conclusion**

254         Bioelectrical Impedance Analysis is associated with Subjective Global Assessment,  
255 and can be used in assessing preoperative nutritional status for patients undergoing surgery for  
256 head and neck malignancies. BIA shows promise as a preoperative tool, in conjunction with  
257 SGA to detect malnutrition in patients undergoing head and neck surgery and highlight patients  
258 at risk of developing perioperative pneumonia.

259 **References**

- 260 1. Kang MC, Kim JH, Ryu SW, Moon JY, Park JH, Park JK, et al. Prevalence of  
261 Malnutrition in Hospitalized Patients: a Multicenter Cross-sectional Study. *J Korean Med Sci.*  
262 2018;33(2):e10.
- 263 2. Pirlich M, Schütz T, Norman K, Gastell S, Lübke HJ, Bischoff SC, et al. The German  
264 hospital malnutrition study. *Clin Nutr.* 2006;25(4):563-72.
- 265 3. Löser C. Malnutrition in hospital: the clinical and economic implications. *Dtsch Arztebl*  
266 *Int.* 2010;107(51-52):911-7.
- 267 4. Lim SL, Ong KC, Chan YH, Loke WC, Ferguson M, Daniels L. Malnutrition and its  
268 impact on cost of hospitalization, length of stay, readmission and 3-year mortality. *Clin Nutr.*  
269 2012;31(3):345-50.
- 270 5. Barker LA, Gout BS, Crowe TC. Hospital malnutrition: prevalence, identification and  
271 impact on patients and the healthcare system. *Int J Environ Res Public Health.* 2011;8(2):514-  
272 27.
- 273 6. Middleton MH, Nazarenko G, Nivison-Smith I, Smerdely P. Prevalence of malnutrition  
274 and 12-month incidence of mortality in two Sydney teaching hospitals. *Intern Med J.*  
275 2001;31(8):455-61.
- 276 7. Agarwal E, Ferguson M, Banks M, Batterham M, Bauer J, Capra S, et al. Malnutrition  
277 and poor food intake are associated with prolonged hospital stay, frequent readmissions, and  
278 greater in-hospital mortality: results from the Nutrition Care Day Survey 2010. *Clin Nutr.*  
279 2013;32(5):737-45.
- 280 8. Müller-Richter U, Betz C, Hartmann S, Brands RC. Nutrition management for head  
281 and neck cancer patients improves clinical outcome and survival. *Nutr Res.* 2017;48:1-8.
- 282 9. Büntzel J, Micke O, Kisters K, Büntzel J, Mücke R. Malnutrition and Survival -  
283 Bioimpedance Data in Head Neck Cancer Patients. *In Vivo.* 2019;33(3):979-82.
- 284 10. Mantzorou M, Tolia M, Poultsidi A, Pavlidou E, Papadopoulou SK, Papandreou D, et  
285 al. Can Bioelectrical Impedance Analysis and BMI be a Prognostic Tool in Head and Neck  
286 Cancer Patients? A Review of the Evidence. *Cancers (Basel).* 2020;12(3).
- 287 11. Keith JN. Bedside nutrition assessment past, present, and future: a review of the  
288 Subjective Global Assessment. *Nutr Clin Pract.* 2008;23(4):410-6.
- 289 12. Raguso CA, Maisonneuve N, Pichard C. [Subjective Global Assessment (SGA):  
290 evaluation and followup of nutritional state]. *Rev Med Suisse Romande.* 2004;124(10):607-  
291 10.
- 292 13. Makhija S, Baker J. The Subjective Global Assessment: a review of its use in clinical  
293 practice. *Nutr Clin Pract.* 2008;23(4):405-9.
- 294 14. Player EL, Morris P, Thomas T, Chan WY, Vyas R, Dutton J, et al. Bioelectrical  
295 impedance analysis (BIA)-derived phase angle (PA) is a practical aid to nutritional assessment  
296 in hospital in-patients. *Clinical Nutrition.* 2019;38(4):1700-6.
- 297 15. Cardinal TR, Wazlawik E, Bastos JL, Nakazora LM, Scheunemann L. Standardized  
298 phase angle indicates nutritional status in hospitalized preoperative patients. *Nutrition*  
299 *Research.* 2010;30(9):594-600.
- 300 16. Barbosa-Silva MC, Barros AJ, Wang J, Heymsfield SB, Pierson RN, Jr. Bioelectrical  
301 impedance analysis: population reference values for phase angle by age and sex. *Am J Clin*  
302 *Nutr.* 2005;82(1):49-52.
- 303 17. Barbosa-Silva MC, Barros AJ. Bioelectrical impedance analysis in clinical practice: a  
304 new perspective on its use beyond body composition equations. *Curr Opin Clin Nutr Metab*  
305 *Care.* 2005;8(3):311-7.
- 306 18. Visser M, van Venrooij LM, Wanders DC, de Vos R, Wisselink W, van Leeuwen PA,  
307 et al. The bioelectrical impedance phase angle as an indicator of undernutrition and adverse  
308 clinical outcome in cardiac surgical patients. *Clin Nutr.* 2012;31(6):981-6.

- 309 19. Barbosa-Silva MCG, Barros AJD. Bioelectric impedance and individual characteristics  
310 as prognostic factors for post-operative complications. *Clinical Nutrition*. 2005;24(5):830-8.
- 311 20. Pena N, Mauricio S, Rodrigues A, Carmo A, Coury N, Correia M, et al. Association  
312 Between Standardized Phase Angle, Nutrition Status, and Clinical Outcomes in Surgical  
313 Cancer Patients. *Nutrition in Clinical Practice*. 2018;34.
- 314 21. Hammerlid E, Wirblad B, Sandin C, Mercke C, Edström S, Kaasa S, et al. Malnutrition  
315 and food intake in relation to quality of life in head and neck cancer patients. *Head Neck*.  
316 1998;20(6):540-8.
- 317 22. Gorenc M, Kozjek NR, Strojjan P. Malnutrition and cachexia in patients with head and  
318 neck cancer treated with (chemo)radiotherapy. *Reports of Practical Oncology & Radiotherapy*.  
319 2015;20(4):249-58.
- 320 23. Dechaphunkul T, Martin L, Alberda C, Olson K, Baracos V, Gramlich L. Malnutrition  
321 assessment in patients with cancers of the head and neck: A call to action and consensus.  
322 *Critical Reviews in Oncology/Hematology*. 2013;88(2):459-76.
- 323 24. Jager-Wittenaar H, Dijkstra PU, Vissink A, van der Laan BFAM, van Oort RP,  
324 Roodenburg JLN. Critical weight loss in head and neck cancer—prevalence and risk factors at  
325 diagnosis: an explorative study. *Supportive Care in Cancer*. 2007;15(9):1045-50.
- 326 25. Kyle UG, Soundar EP, Genton L, Pichard C. Can phase angle determined by  
327 bioelectrical impedance analysis assess nutritional risk? A comparison between healthy and  
328 hospitalized subjects. *Clin Nutr*. 2012;31(6):875-81.
- 329 26. Meireles MS, Wazlawik E, Bastos JL, Garcia MF. Comparison between nutritional risk  
330 tools and parameters derived from bioelectrical impedance analysis with subjective global  
331 assessment. *J Acad Nutr Diet*. 2012;112(10):1543-9.
- 332 27. Małecka-Massalska T, Mlak R, Smolen A, Morshed K. Bioelectrical impedance phase  
333 angle and subjective global assessment in detecting malnutrition among newly diagnosed head  
334 and neck cancer patients. *Eur Arch Otorhinolaryngol*. 2016;273(5):1299-305.
- 335 28. Lukaski HC, Kyle UG, Kondrup J. Assessment of adult malnutrition and prognosis  
336 with bioelectrical impedance analysis: phase angle and impedance ratio. *Curr Opin Clin Nutr  
337 Metab Care*. 2017;20(5):330-9.
- 338 29. Bosy-Westphal A, Danielzik S, Dörhöfer RP, Later W, Wiese S, Müller MJ. Phase  
339 angle from bioelectrical impedance analysis: population reference values by age, sex, and body  
340 mass index. *JPEN J Parenter Enteral Nutr*. 2006;30(4):309-16.
- 341 30. Martin TR. The relationship between malnutrition and lung infections. *Clin Chest Med*.  
342 1987;8(3):359-72.
- 343 31. Lundberg M, Dickinson A, Nikander P, Orell H, Mäkitie A. Low-phase angle in body  
344 composition measurements correlates with prolonged hospital stay in head and neck cancer  
345 patients. *Acta Oto-Laryngologica*. 2019;139(4):383-7.
- 346 32. Axelsson L, Silander E, Bosaeus I, Hammerlid E. Bioelectrical phase angle at diagnosis  
347 as a prognostic factor for survival in advanced head and neck cancer. *Eur Arch  
348 Otorhinolaryngol*. 2018;275(9):2379-86.
- 349 33. Małecka-Massalska T, Powrózek T, Prendecka M, Mlak R, Sobieszek G, Brzozowski  
350 W, et al. Phase Angle as an Objective and Predictive Factor of Radiotherapy-induced Changes  
351 in Body Composition of Male Patients With Head and Neck Cancer. *In Vivo*. 2019;33(5):1645-  
352 51.
- 353 34. Lukaski H, Bolonchuk W, Hall C, Siders W. Validation of tetrapolar bioelectrical  
354 impedance method to assess human body composition. *Journal of applied physiology  
355 (Bethesda, Md : 1985)*. 1986;60:1327-32.
- 356 35. Mulasi U, Kuchnia AJ, Cole AJ, Earthman CP. Bioimpedance at the bedside: current  
357 applications, limitations, and opportunities. *Nutr Clin Pract*. 2015;30(2):180-93.

- 358 36. Khalil SF, Mohktar MS, Ibrahim F. The theory and fundamentals of bioimpedance  
359 analysis in clinical status monitoring and diagnosis of diseases. *Sensors (Basel)*.  
360 2014;14(6):10895-928.
- 361 37. Grundmann O, Yoon SL, Williams JJ. The value of bioelectrical impedance analysis  
362 and phase angle in the evaluation of malnutrition and quality of life in cancer patients—a  
363 comprehensive review. *European Journal of Clinical Nutrition*. 2015;69(12):1290-7.
- 364 38. Sheean P, Gonzalez MC, Prado CM, McKeever L, Hall AM, Braunschweig CA.  
365 American Society for Parenteral and Enteral Nutrition Clinical Guidelines: The Validity of  
366 Body Composition Assessment in Clinical Populations. *Journal of Parenteral and Enteral*  
367 *Nutrition*. 2020;44(1):12-43.
- 368 39. Matarese LE, Charney P. Capturing the Elusive Diagnosis of Malnutrition. *Nutr Clin*  
369 *Pract*. 2017;32(1):11-4.
- 370 40. Bauer J, Capra S, Ferguson M. Use of the scored Patient-Generated Subjective Global  
371 Assessment (PG-SGA) as a nutrition assessment tool in patients with cancer. *European Journal*  
372 *of Clinical Nutrition*. 2002;56(8):779-85.
- 373 41. Barbosa-Silva MCG, Barros AJD. Indications and limitations of the use of subjective  
374 global assessment in clinical practice: an update. *Current Opinion in Clinical Nutrition &*  
375 *Metabolic Care*. 2006;9(3).
- 376 42. Cooper BA, Bartlett LH, Aslani A, Allen BJ, Ibels LS, Pollock CA. Validity of  
377 subjective global assessment as a nutritional marker in end-stage renal disease. *Am J Kidney*  
378 *Dis*. 2002;40(1):126-32.
- 379

## 380 **Supporting Information**

381 **S1 File. Strengthening the Reporting of Observational Studies in Epidemiology**  
382 **(STROBE) Checklist for cohort studies.**



**Figure I: Receiver operating characteristic (ROC) curve of phase angle and Wellness marker for detecting malnutrition**

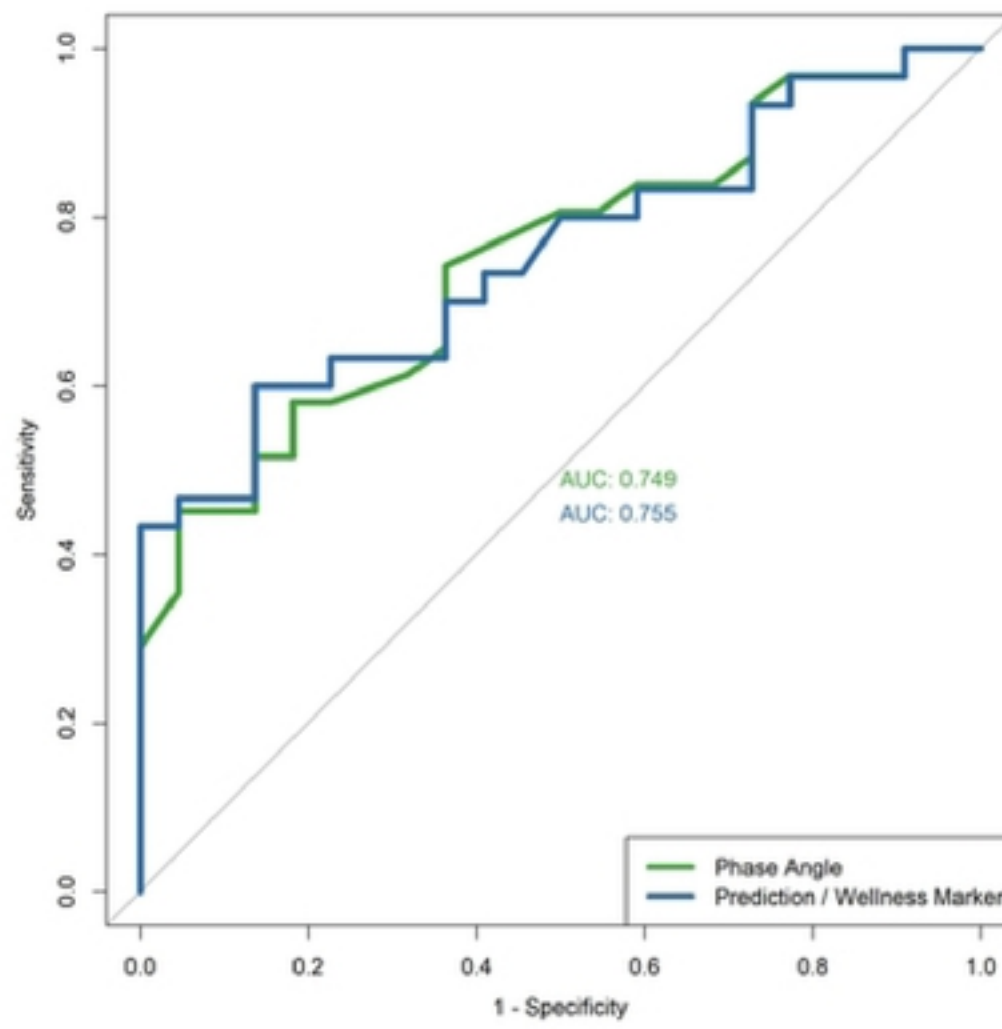

Fig 1. Receiver Operating Characteristic (ROC) curve of phase

**Figure II: Receiver operating characteristics (ROC) curve for phase angle and Wellness marker in predicting for development of perioperative pneumonia**

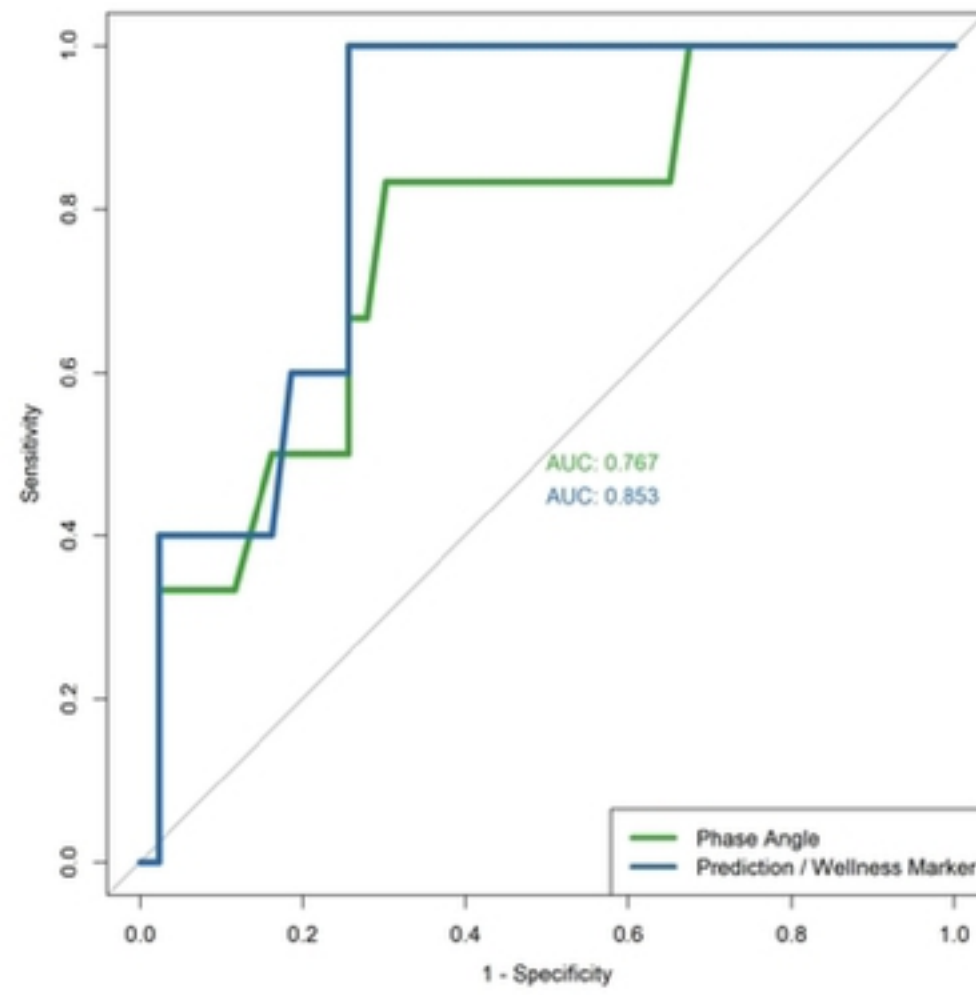

Fig 2. Receiver Operating Characteristic (ROC) curve of phase
